# Supplementary material for: COVID‐19 and cardiac surgery: A perspective from United Kingdom
Source: PubMed Central journal article supplement (PMC7537188; doi:10.1111/jocs.15039), 2020-09-27

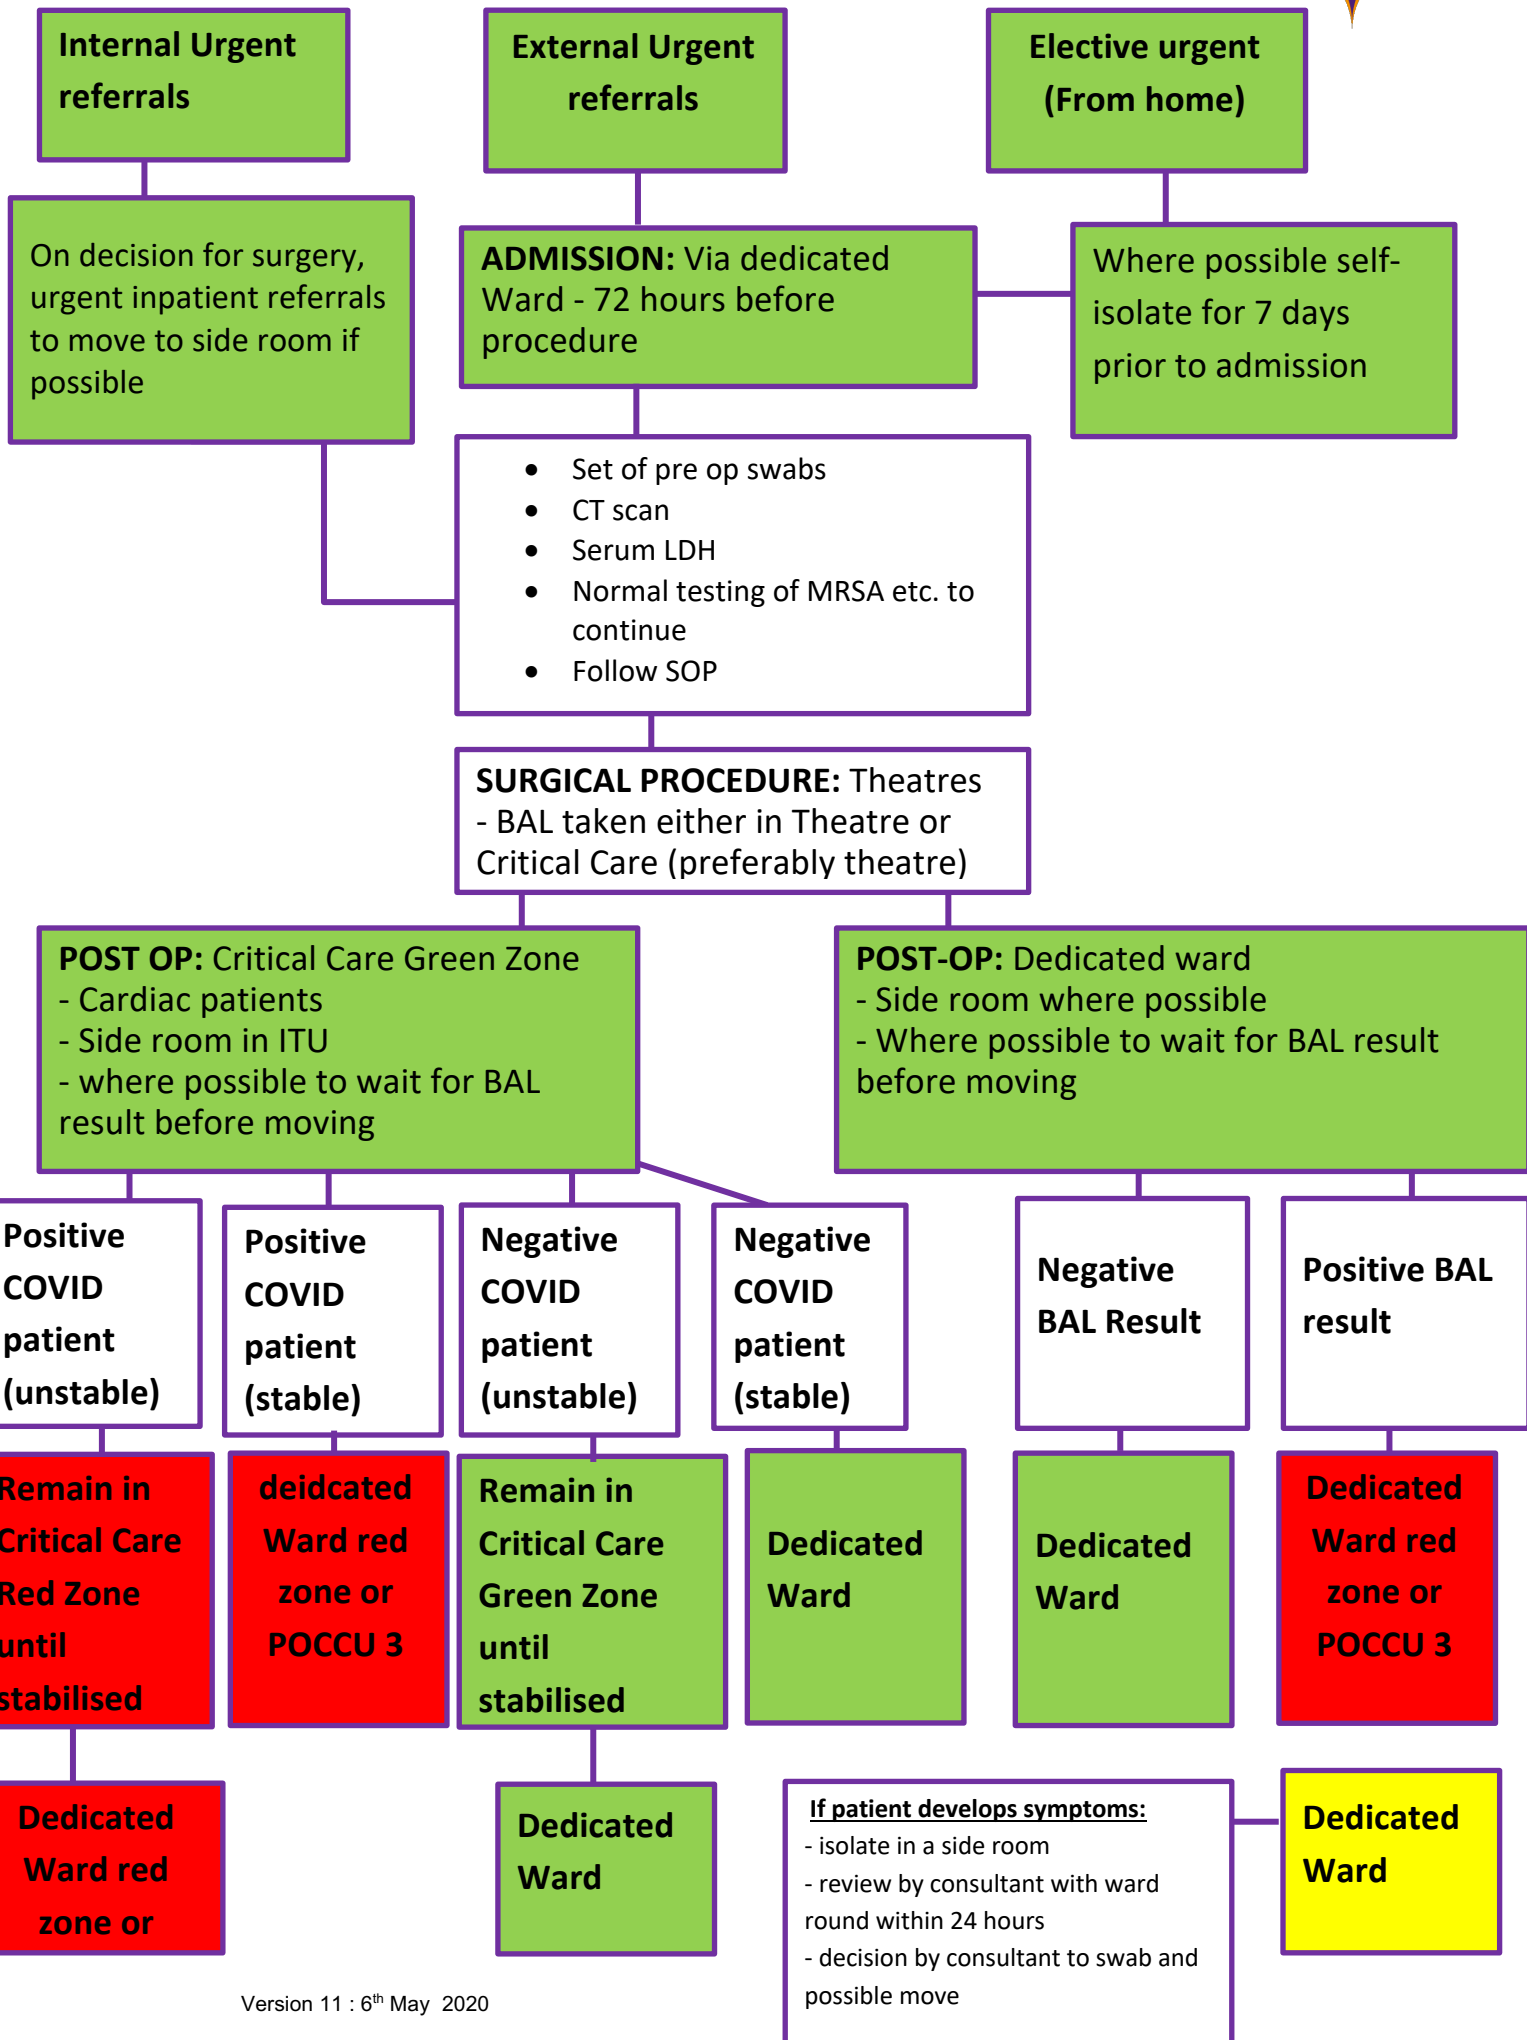

Supplement: JOCS-36-1649-s003.pdf [file JOCS-36-1649-s003.pdf]
